# Supplementary material for: Solar CO2 reduction using a molecular Re(i) catalyst grafted on SiO2via amide and alkyl amine linkages
Source: Royal Society of Chemistry journal article supplement (doi:10.1039/d3dt03623e), 2024-01-01
Supplement: d3dt03623e1.pdf [file d3dt03623e1.pdf]

Supplementary Information

**Solar CO<sub>2</sub> Reduction using a Molecular Re(I) Catalyst Grafted on SiO<sub>2</sub> via Amide and Alkyl Amine Linkages**

Thomas Fenton, Esraa Ahmad, and Gonghu Li \*

Department of Chemistry, University of New Hampshire, Durham, NH 03824, United States

\* Corresponding author. Email: [gonghu.li@unh.edu](mailto:gonghu.li@unh.edu) (G.L.)

**Supplementary Figures**

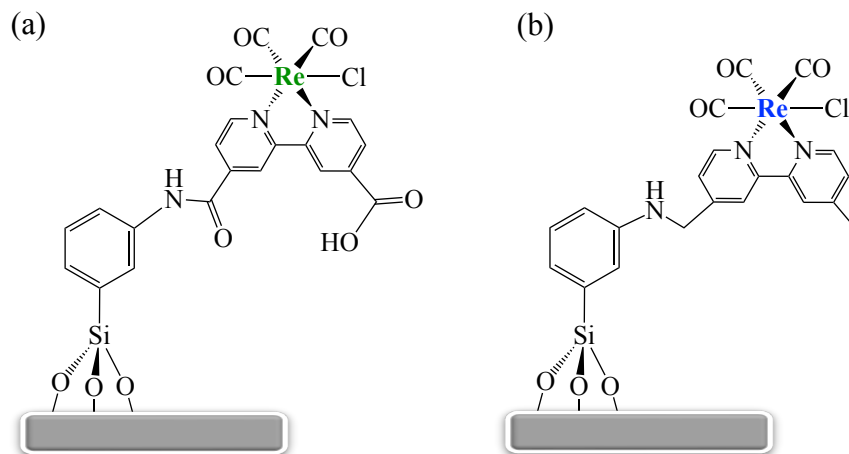

Figure S1. Structures of (a) Re-3-SiO<sub>2</sub> featuring an amide linkage, and (b) Re-4-SiO<sub>2</sub> featuring an alkyl amine linkage.

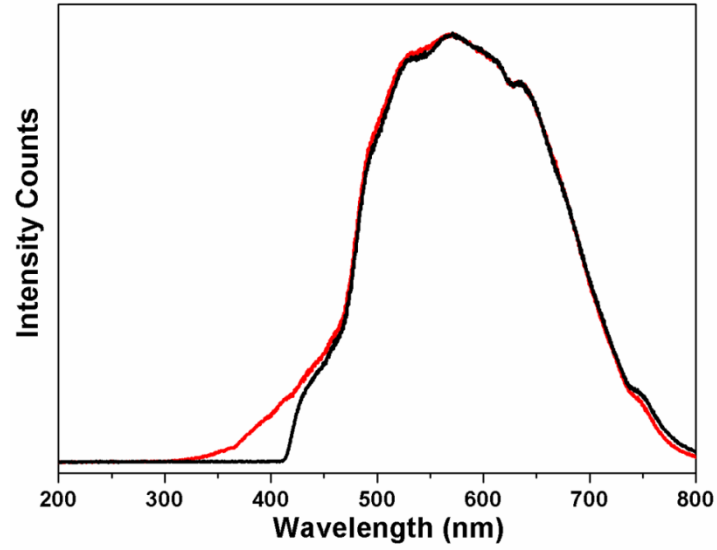

Figure S2. Output spectra of the halogen lamp used in this study without (red trace) and with (black trace) a 420-nm long-pass optical filter.

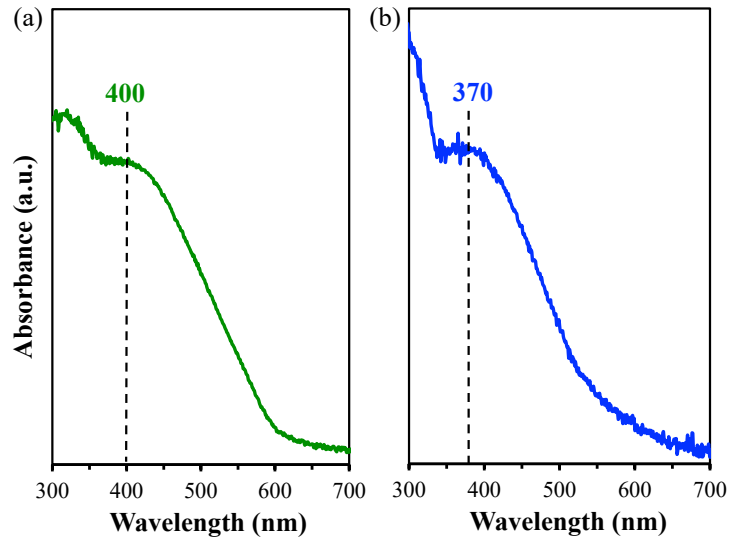

Figure S3. Diffuse reflectance UV-vis spectra of (a) Re-3-SiO<sub>2</sub> and (b) Re-4-SiO<sub>2</sub>. Barium sulfate was used as the background.

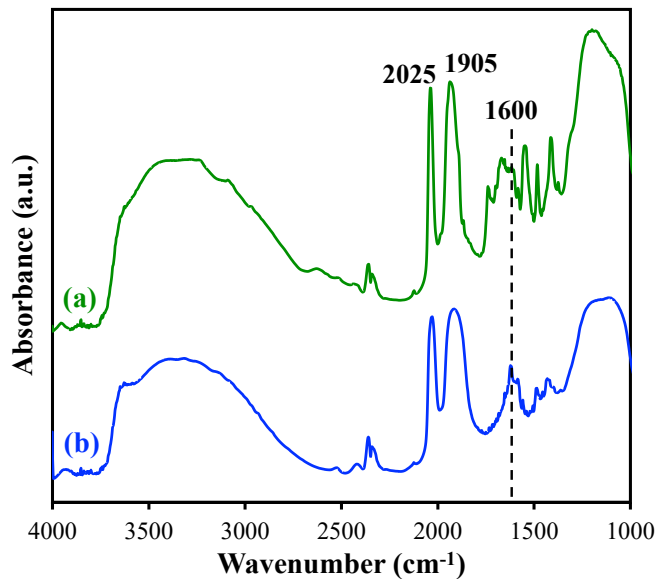

Figure S4. DRIFTS spectra of (a) Re-3-SiO<sub>2</sub> and (b) Re-4-SiO<sub>2</sub>. Potassium bromide was used as the background.

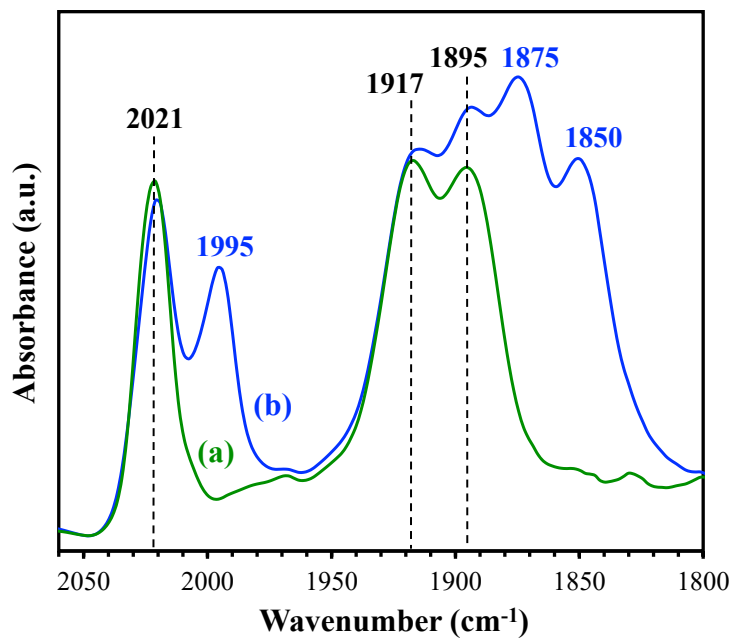

Figure S5. DRIFTS spectra of (a) Re-3-SiO<sub>2</sub> and (b) Re-4-SiO<sub>2</sub> in the presence of TEOA and CO<sub>2</sub>.

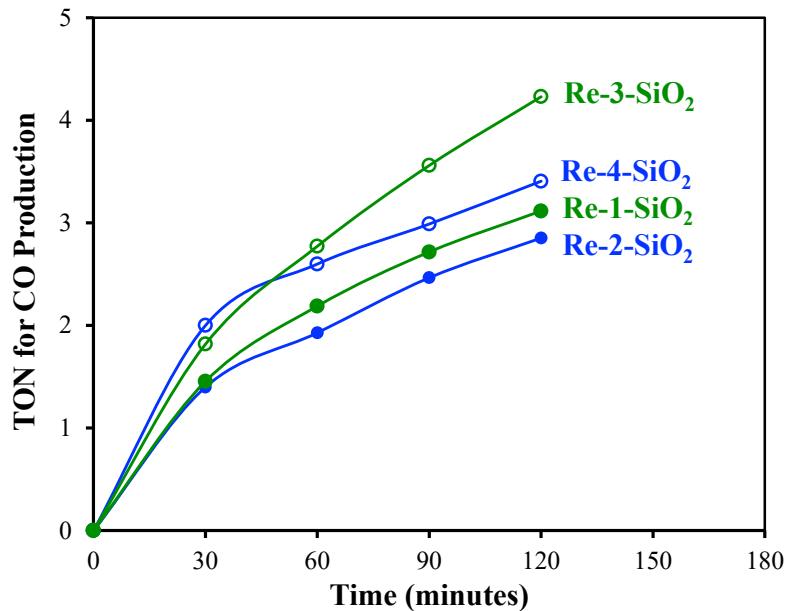

Figure S6. CO production in CO<sub>2</sub> reduction using different heterogenized Re(I) catalysts under simulated solar irradiation (provided by a Xe lamp and an AM1.5 optical filter) in the absence of the Ru(II) photosensitizer. Light intensity was 100 mW/cm<sup>2</sup>.

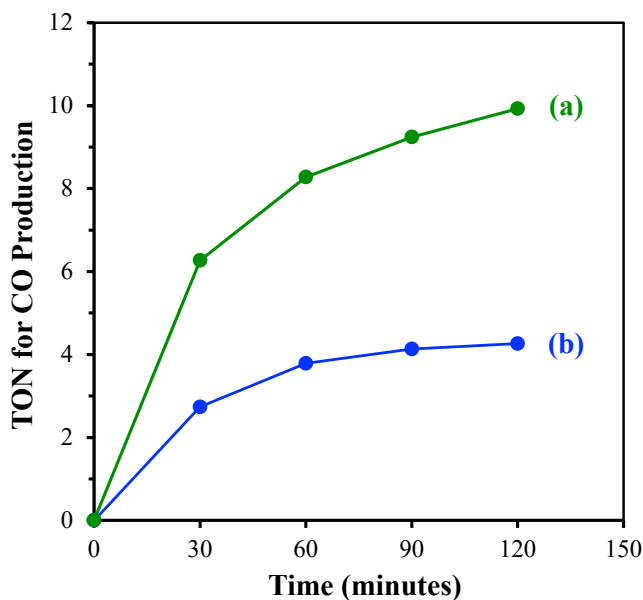

Figure S7. CO production in CO<sub>2</sub> reduction using (a) Re-3-SiO<sub>2</sub> and (b) Re-4-SiO<sub>2</sub> under visible light using a molecular Ru(II) photosensitizer. Light intensity was 100 mW/cm<sup>2</sup>. The loadings of Re were determined to be 2.7 and 4.2  $\mu\text{mol}$  per 10 mg of Re-3-SiO<sub>2</sub> and Re-4-SiO<sub>2</sub>, respectively.

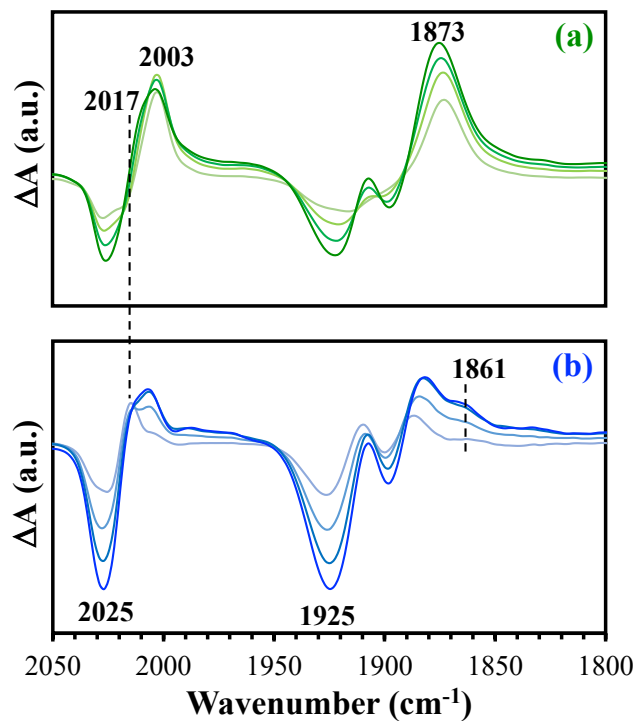

Figure S8. Difference DRIFTS spectra of (a) Re-3-SiO<sub>2</sub> and (b) Re-4-SiO<sub>2</sub> upon light irradiation in the presence of TEOA and CO<sub>2</sub>. The spectra were obtained by subtracting spectra collected before light irradiation ( $t = 0$ ) from corresponding spectra collected after light irradiation for different times (2, 10, 30, and 60 min).
